# Supplementary material for: Oversaturated iron sites on mesopore-rich carbon nanocages boost adsorption and transformation of polysulfides for lithium–sulfur batteries
Source: Royal Society of Chemistry journal article supplement (doi:10.1039/d4ta06750a), 2025-01-01
Supplement: d4ta06750a1.pdf [file d4ta06750a1.pdf]

## Supplementary Information

### **Oversaturated iron sites on mesopore-rich carbon nanocages boost adsorption and transformation of polysulfides for lithium-sulfur batteries**

Zhuo Zhu,<sup>‡a</sup> Guilan Fan,<sup>‡c</sup> Hai Huang,<sup>b</sup> Yan Guo,<sup>c</sup> Xiaojun Gu<sup>\*c</sup> and Jun Song Chen<sup>\*bd</sup>

<sup>a</sup>School of Chemistry, Chemical Engineering and Biotechnology, Nanyang Technological University, 62 Nanyang Drive, Singapore 637459, Singapore.

<sup>b</sup>School of Materials and Energy, University of Electronic Science and Technology of China, Chengdu 611731, China. E-mail: jschen@uestc.edu.cn

<sup>c</sup>School of Chemistry and Chemical Engineering, Inner Mongolia University, Hohhot 010021, China. E-mail: [xiaojun.gu@imu.edu.cn](mailto:xiaojun.gu@imu.edu.cn)

<sup>d</sup>Shenzhen Institute for Advanced Study, University of Electronic Science and Technology of China, Shenzhen, China.

## Experimental Section

*Synthesis of ZIF-8 nanocubes.* 300 mg of  $\text{Zn}(\text{CH}_3\text{COO})_2 \cdot 2\text{H}_2\text{O}$  is dissolved in 5 mL of deionized  $\text{H}_2\text{O}$  to form solution A. 1116 mg of 2-methylimidazole and 0.8 mg of cetyltrimethylammonium bromide (CTAB) are dissolved in 5 mL of deionized  $\text{H}_2\text{O}$  to form solution B. Then, solution A is added into solution B, and the mixture is shaken for about 16 s and subsequently left undisturbed at room temperature for 2 h. The resulting ZIF-8 nanocubes are washed with ethanol for several times.

*Synthesis of Fe-Phen/ZIF-8/polydopamine (Fe-Phen-ZIF-8@PDA).* Typically,  $\text{FeSO}_4 \cdot 7\text{H}_2\text{O}$  (13.4 mg) and 1,10-phenanthroline (Phen, 26 mg) are dissolved in ethanol (30 mL) with stirring for 1 h. Subsequently, the as-prepared ZIF-8 nanocubes (200 mg) is added and stirred for another 10 min. The whole reaction mixture is then stirring at 50 °C for 2 h. After cooling to the room temperature, the above mixture and 65 mg of dopamine hydrochloride are added into a Tris solution (10 mM, 200 mL) and stirred for 12 h. The resultant Fe-Phen-ZIF-8@PDA products are collected by centrifugation, washed with ethanol and dried at the vacuum environment.

*Synthesis of Fe single atoms on nitrogen-doped carbon nanocages (Fe-NCNC).* The as-prepared Fe-Phen-ZIF-8@PDA is heated to 1000 °C and maintained for 1 h under Ar atmosphere. The obtained sample is soaked in hydrochloric acid solution for about 6 h at room temperature. The suspension is centrifuged and washed with ethanol for several times.

*Synthesis of ZIF-8/polydopamine (ZIF-8@PDA).* The as-prepared ZIF-8 nanocubes (200 mg) are dispersed in ethanol (30 mL) with stirring at 50 °C for 2 h. After cooling to the room temperature, the above mixture and 65 mg of dopamine hydrochloride are added into a Tris solution (10 mM, 200 mL) and stirred for 12 h. The resultant ZIF-8@PDA products are collected by centrifugation, washed with ethanol and dried at the vacuum environment.

*Synthesis of nitrogen-doped carbon nanocages (NCNC).* The as-prepared ZIF-8@PDA is heated to 1000 °C and maintained for 1 h under Ar atmosphere. The obtained sample is soaked in hydrochloric acid aqueous solution for about 6 h at room temperature. The suspension is centrifuged and washed with ethanol for several times.

*Fabrication of Fe-NCNC/S and NCNC/S composites.* The Fe-NCNC/S and NCNC/S composites are fabricated via a melt-diffusion method. Typically, a mixture of sulfur powder and host material (Fe-

NCNC, NCNC) with a mass ratio of 7:3 is sealed in a glass bottle, and then heated at 155 °C for 6 h in an oven under Ar atmosphere.

*Adsorption measurements of Li<sub>2</sub>S<sub>6</sub>.* To fabricate the 5 mM of Li<sub>2</sub>S<sub>6</sub> solution, Li<sub>2</sub>S and sulfur (molar ratio: 1:5) are dissolved in 1,3-dioxolane (DOL) and 1,2-dimethoxyethane (DME) (1:1, v/v), and stirred at 50 °C for 24 h to form the brown solution. 5 mg of host material (Fe-NCNC, NCNC) is added into 2.5 mL of Li<sub>2</sub>S<sub>6</sub> solution, then waiting for 6 h. The supernatants and precipitates of the mixtures are analyzed by ultraviolet-visible (UV-Vis) spectroscopy and X-ray photoelectron spectroscopy (XPS), respectively.

*Li<sub>2</sub>S<sub>6</sub> symmetric cell measurements.* For the symmetric cells, both anode and cathode are composed of host material (Fe-NCNC, NCNC) and poly(vinylidene fluoride) with a mass ratio of 4:1 coated onto carbon paper, which are dried in a vacuum oven at 60°C for 12 h. The electrolyte is composed of 0.5 M Li<sub>2</sub>S<sub>6</sub> and 0.5 M LiTFSI in a mixed solvent of DOL and DME (1:1, v/v). Cyclic voltammetry (CV) measurements are performed on a CHI 660E electrochemical workstation within the voltage range of -0.8~0.8 V.

*Material characterizations.* X-ray diffraction (XRD) patterns of samples are analyzed with a powder X-ray diffractometer (Bruker D2 Phaser X-ray Diffractometer with Ni filtered Cu K $\alpha$  radiation). The morphology of samples is characterized by field-emission scanning electron microscope (FESEM, JEOL-6700) and transmission electron microscope (TEM, JEOL, JEM-1400 and JEM-2100F). Energy-dispersive X-ray (EDX) spectroscopy elemental mapping is recorded with the TEM instrument (FEI Talos F200X G2). N<sub>2</sub> adsorption-desorption isotherms are recorded and analyzed on Micromeritics 3Flex. Thermogravimetric analysis (TGA) is performed on a Shimadzu DRG-60 thermal analyzer under N<sub>2</sub> flow. XPS measurements are carried out on PHI Quantum 2000 to study the chemical states of elements in samples. All binding energies are referenced to the C 1s peak of the surface adventitious carbon at 284.8 eV. UV-Vis spectroscopy (Shimadzu UV 2450 Spectrometer) is performed to analyze the adsorption degree of polysulfides on the host materials. X-ray absorption spectroscopy (XAS) measurements of Fe K-edge are performed at the National Synchrotron Radiation Research Center (NSRRC), Taiwan.

*Electrochemical measurements.* To prepare the cathodes, the as-prepared composites (Fe-NCNC/S and NCNC/S), Ketjen black, and poly(vinylidene fluoride) binder are mixed in N-methyl pyrrolidone

(NMP) with a weight ratio of 8:1:1. Then, the slurry is spread onto a carbon paper with the areal sulfur loading of 1.1~1.5 mg cm<sup>-2</sup>. The Li-S coin cells are assembled using as-prepared cathodes, Celgard membrane as separator and Li foil as an anode in an argon-filled glovebox. The electrolyte is comprised of 1.0 M lithium bis(trifluoromethanesulfonyl) imide (LiTFSI) in a mixed solvent of DOL and DME (1:1, v/v) with 0.2 M of LiNO<sub>3</sub>. The electrolyte/sulfur ratio used in the coin cell is 30:1 (μL:mg). Galvanostatic discharge/charge tests are performed on a Neware Battery Measurement System (Neware, China) in the voltage range of 1.7~2.8 V (vs. Li<sup>+</sup>/Li) at room temperature. The current density and specific capacities are based on the weight of sulfur (1.0 C = 1675 mA g<sup>-1</sup>). CV measurements are conducted at 0.1 mV s<sup>-1</sup> in the voltage range of 1.7~2.8 V on a CHI 660E electrochemical workstation. Electrochemical impedance spectroscopy (EIS) is obtained by applying a sine wave with an amplitude of 5 mV over the frequency ranging from 100 kHz to 100 mHz on a CHI 660E electrochemical workstation.

*Computational details.* Density functional theory (DFT) calculations are performed by the Vienna Ab initio Simulation package (VASP)<sup>1</sup>, and the exchange-correlation energy is approximately described by Perdew, Burke and Ernzerhof (PBE) functional based on the generalized gradient approximation (GGA)<sup>2</sup>. The plane wave basis sets with projector-augmented wave (PAW) pseudopotentials are applied in structure optimization<sup>3</sup>. The plane-wave cutoff energy is set to be 500 eV. The convergence tolerance of geometry optimization is set to be  $1.0 \times 10^{-5}$  eV for energy, and all the forces on each atom are smaller than 0.02 eV Å<sup>-1</sup>. The spin-polarized condition and van der Waals interaction (Grimme's DFT-D3 method) are adopted for the whole DFT calculations<sup>4</sup>. All Fe single atom supported on the graphene models are constructed based on the graphene basal plane model with the supercell of 3×5×1 (12.78 Å×12.30 Å×15.00 Å). The Gamma-centered Monkhorst-Pack k-points grids for graphene basal plane (Fe-NCNC and NCNC models) is set to 3×3×1. All the structures discussed in this work are visualized in the Visualization for Electronic and Structural Analysis (VESTA)<sup>5</sup>.

The Gibbs free energies ( $G$ ) of adsorbed intermediates are calculated by:

$$G(\text{ad}) = E(\text{ad}) + ZPE(\text{ad}) - TS(\text{ad})$$

Total energy ( $E$ ), zero-point energy ( $ZPE$ ) and entropy contribution ( $TS$ ) of each adsorbed state are obtained from DFT calculations.

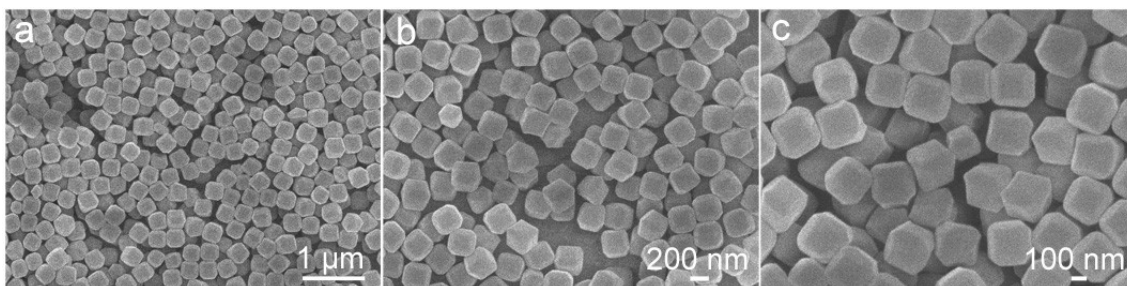

**Fig. S1** (a-c) FESEM images of ZIF-8 nanocubes at different magnifications.

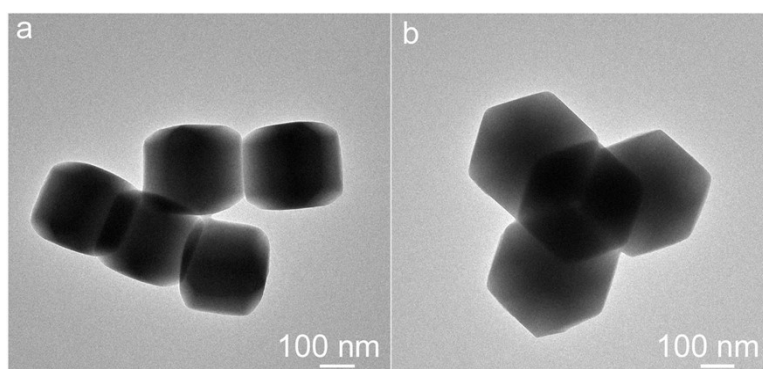

**Fig. S2** (a, b) TEM images of ZIF-8 nanocubes at different magnifications.

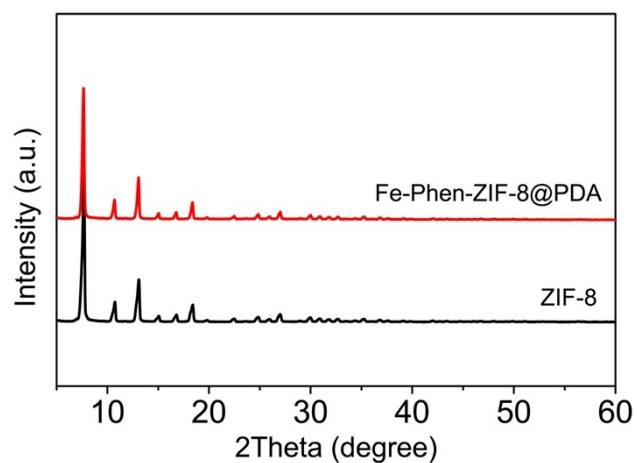

**Fig. S3** XRD patterns of ZIF-8 nanocubes and Fe-Phen-ZIF-8@PDA.

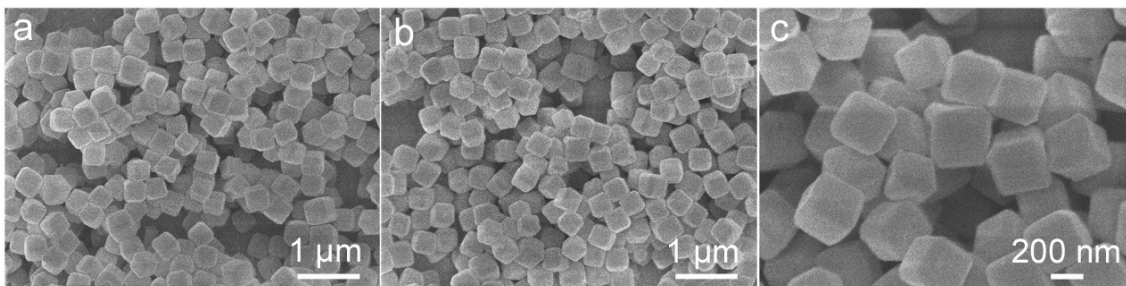

**Fig. S4** (a-c) FESEM images of ZIF-8@PDA at different magnifications.

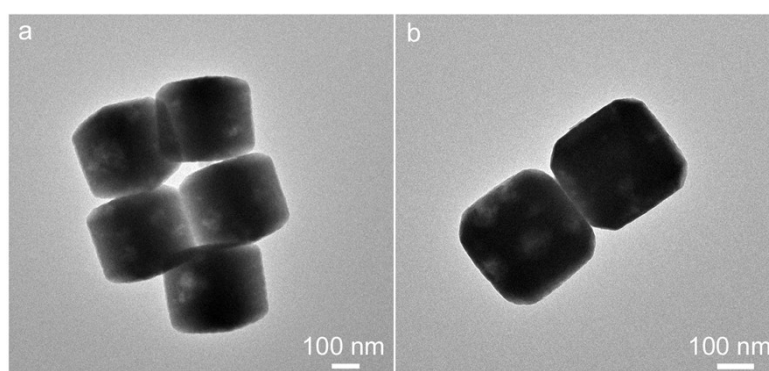

**Fig. S5** (a-b) TEM images of ZIF-8@PDA at different magnifications.

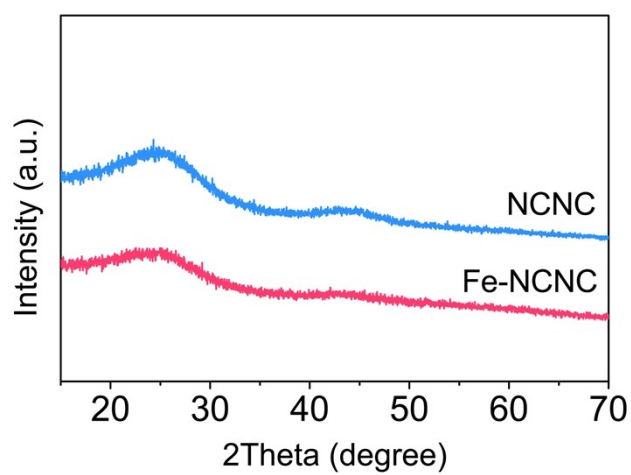

**Fig. S6** XRD patterns of the as-prepared Fe-NCNC and NCNC.

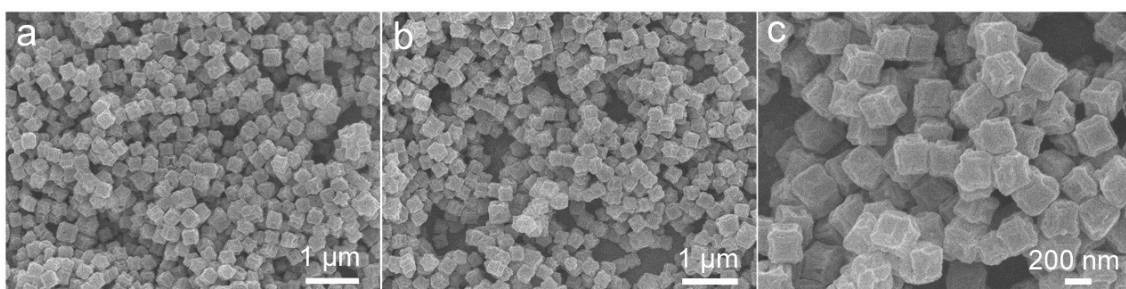

**Fig. S7** (a-c) FESEM images of NCNC at different magnifications.

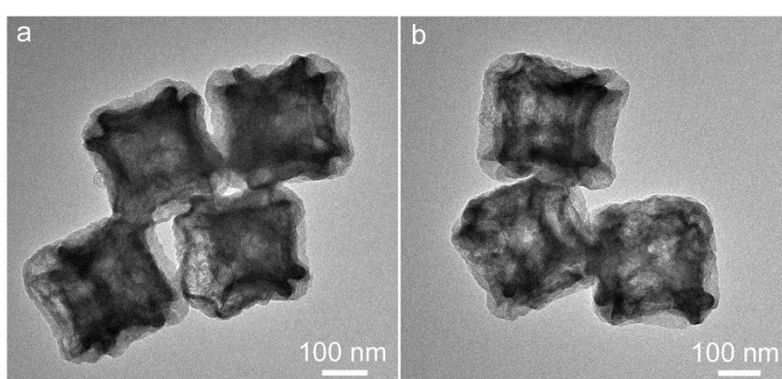

**Fig. S8** (a-b) TEM images of NCNC at different magnifications.

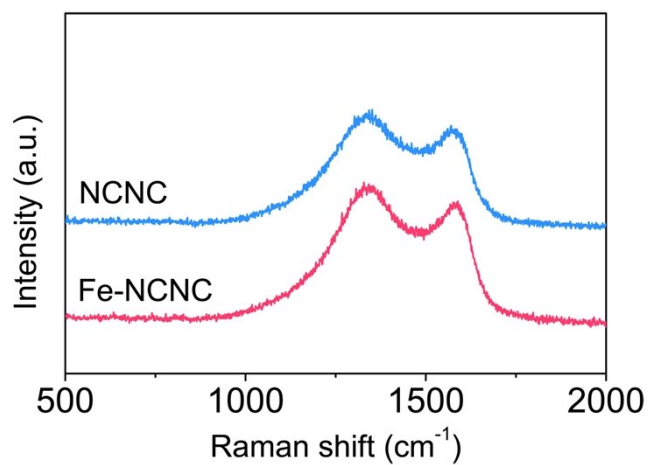

**Fig. S9** Raman spectra of the as-prepared Fe-NCNC and NCNC.

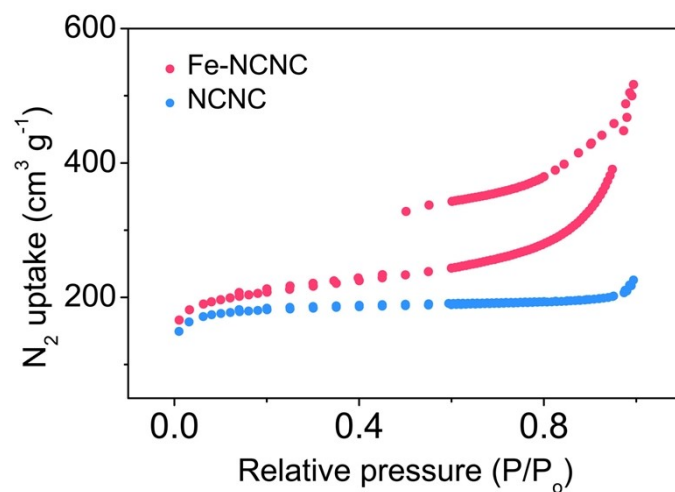

**Fig. S10** N<sub>2</sub> adsorption-desorption isotherms of Fe-NCNC and NCNC.

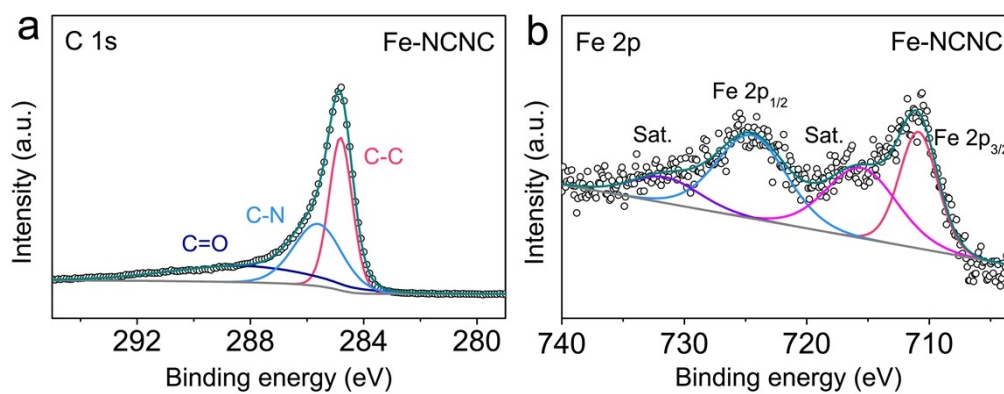

**Fig. S11** (a) C 1s and (b) Fe 2p XPS spectra of Fe-NCNC.



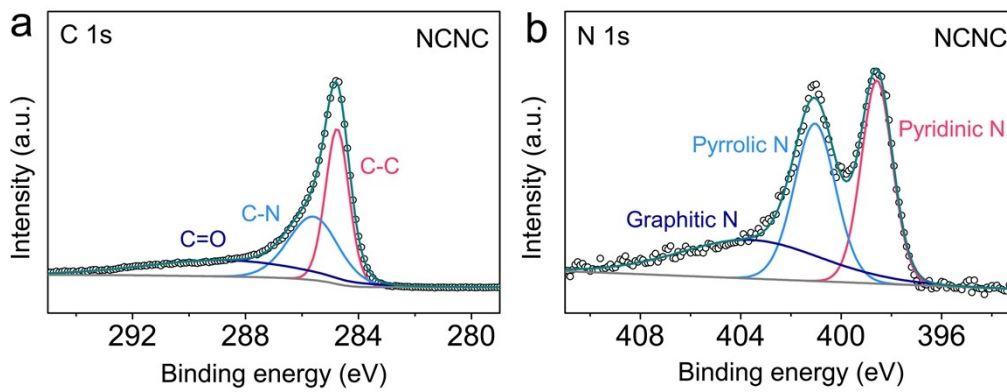

**Fig. S12** (a) C 1s and (b) N 1s XPS spectra of NCNC.

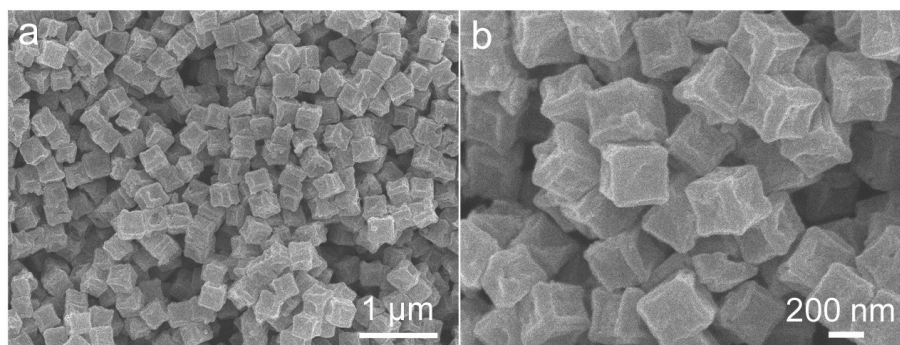

**Fig. S13** (a-b) FESEM images of NCNC/S composite at different magnifications.

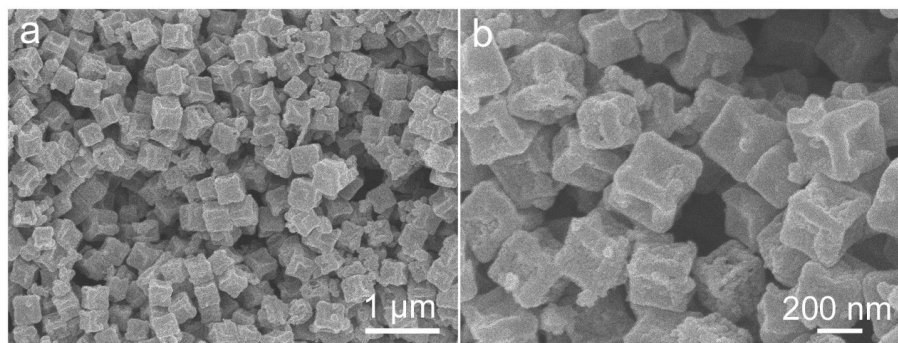

**Fig. S14** (a-b) FESEM images of Fe-NCNC/S composite at different magnifications.

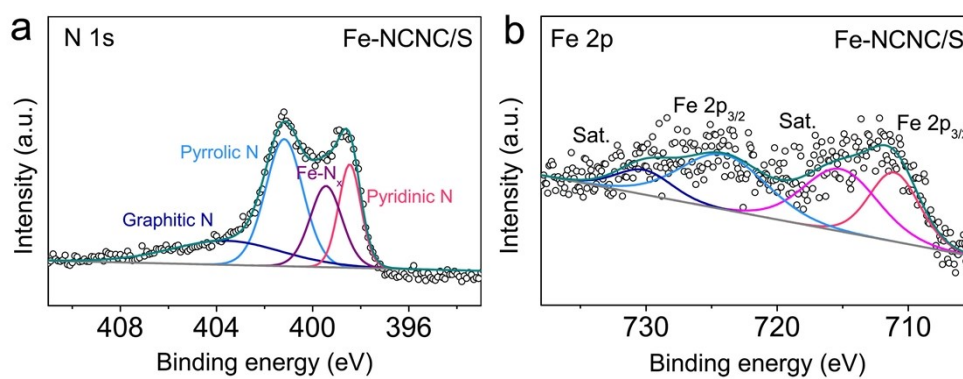

**Fig. S15** (a) N 1s and (b) Fe 2p XPS spectra of Fe-NCNC/S composite.

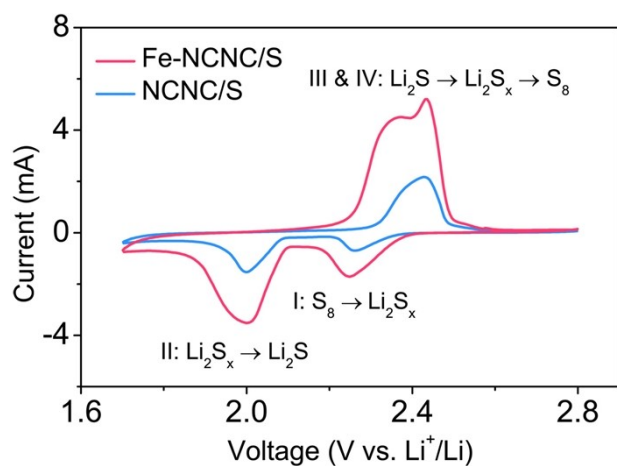

**Fig. S16** CV curves for the second cycle of Fe-NCNC/S and NCNC/S electrodes at  $0.1 \text{ mV s}^{-1}$ .

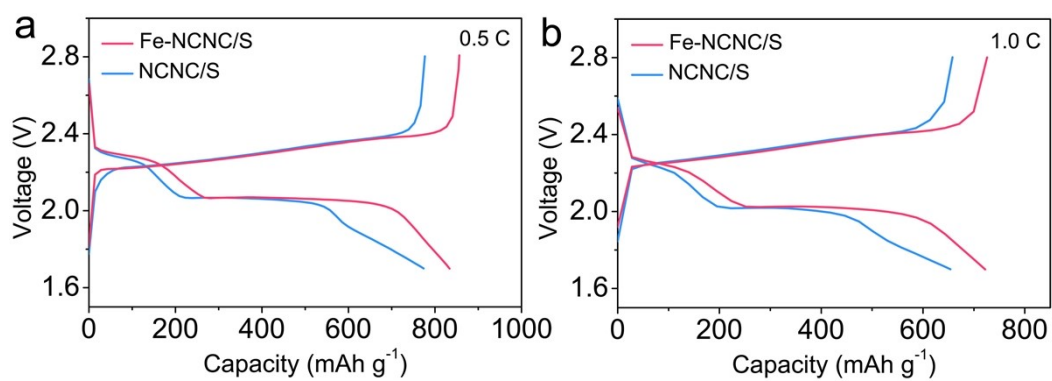

**Fig. S17** Discharge-charge voltage profiles of the Fe-NCNC/S and NCNC/S cathodes at 0.5 C and 1.0 C.

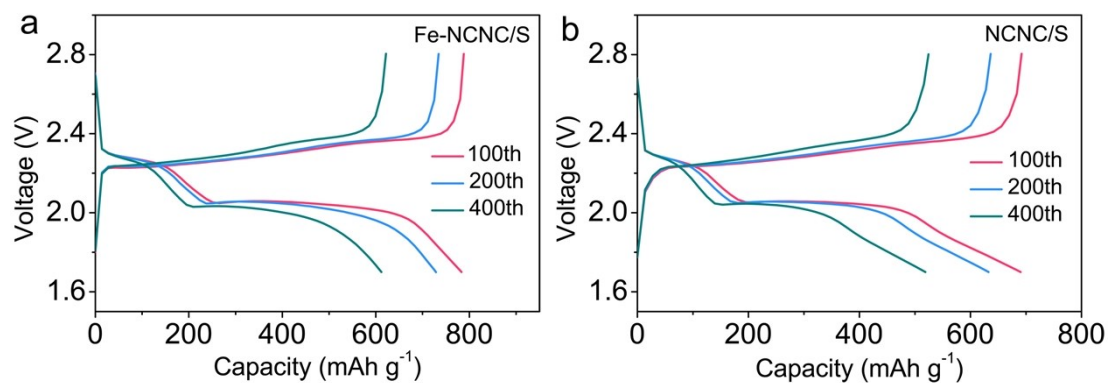

**Fig. S18** Discharge-charge voltage profiles of the Fe-NCNC/S and NCNC/S electrodes during cycling of 400 cycles at 0.5 C.

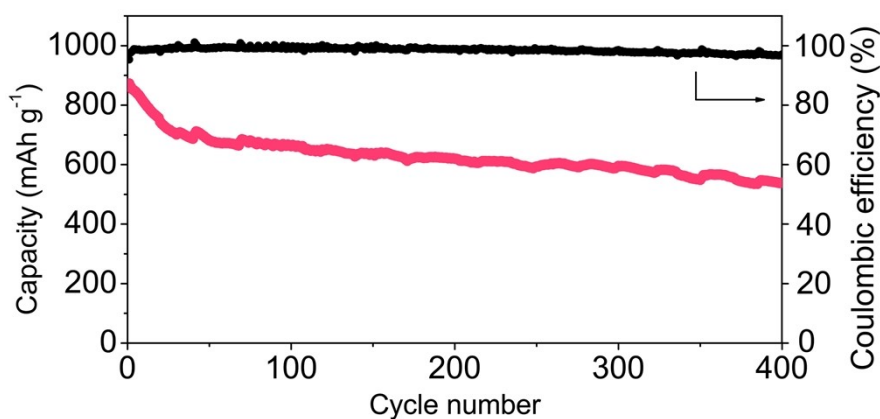

**Fig. S19** Long-cycling performance of the Fe-NCNC/S electrode at 1.0 C and the corresponding Coulombic efficiency.

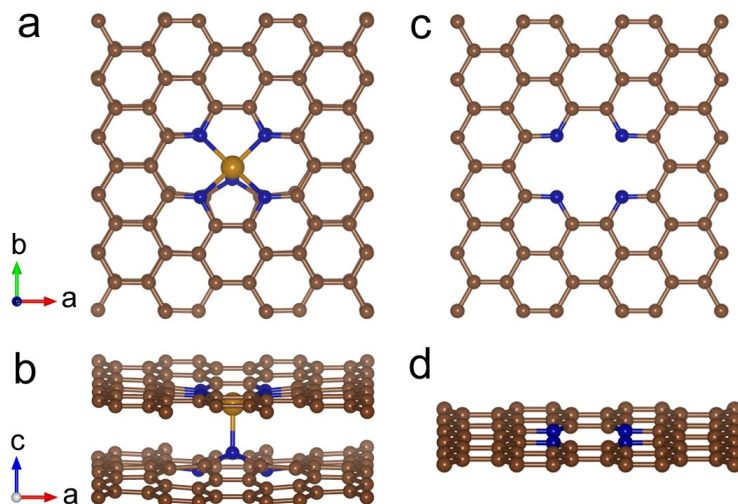

**Fig. S20** Optimized structures of (a, b) Fe-NCNC and (c, d) NCNC used in first-principles calculations. The brown, blue and bright brown balls represent C, N and Fe atoms, respectively.

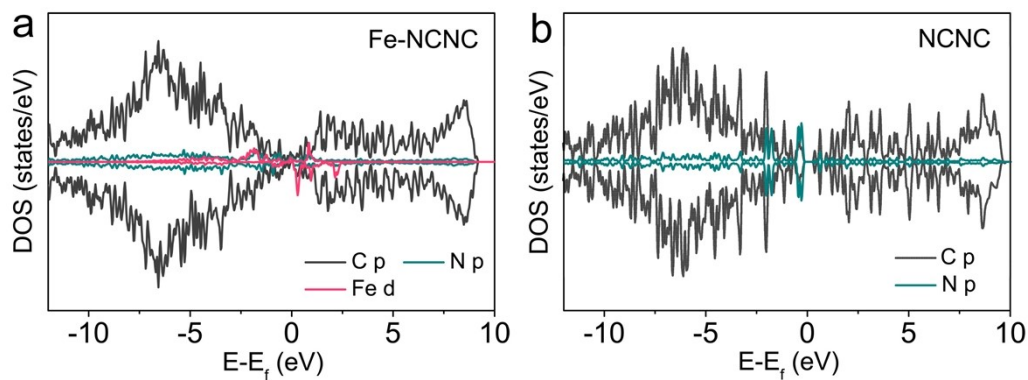

**Fig. S21** The calculated density of state (DOS) of Fe-NCNC and NCNC.

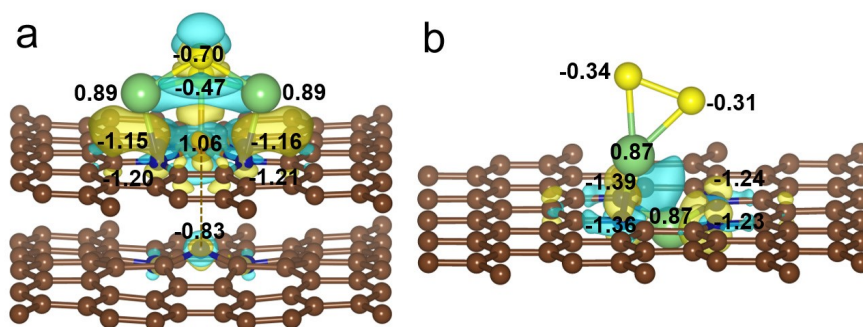

**Fig. S22** Charge density difference plots of  $\text{Li}_2\text{S}_2$  adsorbed on (a) Fe-NCNC and (b) NCNC with the isosurface value of  $0.002 \text{ e bohr}^{-3}$ . Cyan and yellow areas correspond to the respective charge depletion and accumulation.

**Table S1.** Fitting parameters of the Fe K-edge EXAFS curves for Fe-NCNC.

| Path | R (Å) | N | $\Delta E_0$ (eV) | $\sigma^2$ ( $10^{-3}\text{Å}^2$ ) |
|------|-------|---|-------------------|------------------------------------|
| Fe-N | 1.98  | 5 | 6.3               | 9.4                                |

R is the distance between absorber and backscatter atoms; N is the coordination number;  $\Delta E_0$  is the inner potential correction;  $\sigma^2$  is the Debye-Waller factor to account for both thermal and structural disorder.

**Note S1.** Fractional coordinates of the compounds mentioned in DFT calculations (Fe-NCNC:  $a = 12.78 \text{ \AA}$ ,  $b = 12.30 \text{ \AA}$ ,  $c = 17.00 \text{ \AA}$ ,  $\alpha = \beta = \gamma = 90^\circ$ ; NCNC:  $a = 12.72 \text{ \AA}$ ,  $b = 12.39 \text{ \AA}$ ,  $c = 15.00 \text{ \AA}$ ,  $\alpha = \beta = \gamma = 90^\circ$ ).

| Fe-NCNC |           |           | NCNC     |   |           |           |          |
|---------|-----------|-----------|----------|---|-----------|-----------|----------|
| C       | 0.701337  | 12.280566 | 8.376767 | C | 11.336915 | 8.573887  | 8.251596 |
| C       | 2.828166  | 1.210541  | 8.402913 | C | 9.902769  | 8.583223  | 8.198216 |
| C       | 1.407328  | 1.217516  | 8.405344 | C | 12.051827 | 7.343703  | 8.256033 |
| C       | 3.537518  | 12.280283 | 8.363881 | C | 0.706962  | 9.806040  | 8.294368 |
| C       | 4.957399  | 12.279287 | 8.365343 | C | 2.828844  | 11.050344 | 8.311572 |
| C       | 7.092128  | 1.194674  | 8.414388 | C | 1.407468  | 11.044674 | 8.329456 |
| C       | 5.675583  | 1.195056  | 8.412841 | C | 3.544472  | 9.829410  | 8.230533 |
| C       | 7.810082  | 12.278942 | 8.366210 | C | 4.964506  | 9.845264  | 8.199916 |
| C       | 9.230065  | 12.280222 | 8.365411 | C | 7.092000  | 11.064108 | 8.290050 |
| C       | 11.360153 | 1.217024  | 8.406925 | C | 5.675238  | 11.064465 | 8.290152 |
| C       | 9.939148  | 1.210591  | 8.405208 | C | 7.803205  | 9.844994  | 8.199916 |
| C       | 12.066182 | 12.280332 | 8.377838 | C | 9.223149  | 9.829016  | 8.230431 |
| C       | 0.706975  | 2.456814  | 8.416887 | C | 11.359501 | 11.044625 | 8.330204 |
| C       | 2.861657  | 3.679028  | 8.378807 | C | 9.938202  | 11.050320 | 8.313051 |
| C       | 1.428150  | 3.689164  | 8.393206 | C | 12.059317 | 9.806040  | 8.294487 |
| C       | 3.543117  | 2.434305  | 8.407690 | C | 0.683173  | 0.055190  | 4.672008 |
| C       | 4.963176  | 2.416458  | 8.414728 | C | 2.802665  | 1.279163  | 4.661519 |
| C       | 7.098800  | 3.629496  | 8.351046 | C | 1.385700  | 1.290799  | 4.714831 |
| C       | 5.667761  | 3.629644  | 8.351454 | C | 3.513871  | 0.044182  | 4.558244 |
| C       | 7.803755  | 2.416409  | 8.415306 | C | 4.938404  | 0.012903  | 4.488170 |
| C       | 9.223699  | 2.434022  | 8.409492 | C | 7.077581  | 1.223961  | 4.501022 |
| C       | 11.338205 | 3.688967  | 8.394736 | C | 5.654326  | 1.224379  | 4.499815 |
| C       | 9.904700  | 3.678869  | 8.380286 | C | 7.793376  | 0.012325  | 4.490159 |
| C       | 12.059688 | 2.456568  | 8.417975 | C | 9.217806  | 0.043911  | 4.561678 |
| C       | 0.715258  | 4.920037  | 8.345555 | C | 11.345581 | 1.290405  | 4.718027 |
| C       | 2.924994  | 6.130320  | 8.201259 | C | 9.928474  | 1.278388  | 4.668098 |
| C       | 1.468620  | 6.131070  | 8.270211 | C | 12.048478 | 0.055055  | 4.675153 |
| C       | 3.635484  | 4.884736  | 8.268749 | C | 0.692773  | 2.541168  | 4.794323 |
| C       | 9.130949  | 4.884638  | 8.267576 | C | 2.896975  | 3.771229  | 4.893654 |
| C       | 11.298401 | 6.131021  | 8.270296 | C | 1.439872  | 3.769421  | 4.868902 |
| C       | 9.841707  | 6.130086  | 8.200562 | C | 3.525465  | 2.498105  | 4.733123 |
| C       | 12.051788 | 4.919902  | 8.346099 | C | 4.929852  | 2.435744  | 4.627468 |
| C       | 0.715679  | 7.343617  | 8.256509 | C | 7.067866  | 3.596569  | 4.809232 |
| C       | 2.864558  | 8.583653  | 8.199185 | C | 5.663197  | 3.596704  | 4.809385 |
| C       | 1.430106  | 8.574170  | 8.252123 | C | 7.801224  | 2.435449  | 4.630443 |
| C       | 3.637529  | 7.374588  | 8.111159 | C | 9.205394  | 2.497281  | 4.738155 |
| C       | 7.098480  | 8.636224  | 8.065820 | C | 11.289555 | 3.769224  | 4.870942 |
| C       | 5.669141  | 8.636310  | 8.066942 | C | 9.832964  | 3.770700  | 4.897105 |
| C       | 9.129517  | 7.374318  | 8.109935 | C | 12.037127 | 2.541119  | 4.796193 |
|         |           |           |          | C | 0.700136  | 4.984932  | 4.900675 |



|    |           |           |          |      |           |           |          |
|----|-----------|-----------|----------|------|-----------|-----------|----------|
| C  | 2.910026  | 6.207097  | 4.897326 | C    | 7.092128  | 13.494675 | 8.414388 |
| C  | 1.458880  | 6.199914  | 4.858464 | C    | 12.066182 | -0.019668 | 8.377838 |
| C  | 3.693452  | 4.999052  | 5.046977 | C    | 11.360153 | 13.517024 | 8.406925 |
| C  | 5.181885  | 4.854822  | 5.184609 | C    | 13.483838 | 12.280566 | 8.376767 |
| C  | 7.549306  | 4.854699  | 5.183912 | C    | -0.722812 | 2.456568  | 8.417975 |
| C  | 9.037304  | 4.998868  | 5.047827 | C    | -0.730712 | 4.919902  | 8.346099 |
| C  | 11.271033 | 6.200159  | 4.858957 | C    | -0.730673 | 7.343703  | 8.256033 |
| C  | 9.820297  | 6.206937  | 4.898295 | C    | -0.723183 | 9.806040  | 8.294487 |
| C  | 12.029062 | 4.984944  | 4.900692 | C    | -0.734022 | 0.055055  | 4.675153 |
| C  | 0.694716  | 7.415363  | 4.755410 | C    | 1.391337  | -1.179915 | 4.625513 |
| C  | 2.816458  | 8.665965  | 4.626329 | C    | 5.655157  | -1.209692 | 4.460715 |
| C  | 1.392308  | 8.652989  | 4.676275 | C    | 9.924334  | -1.179976 | 4.569345 |
| C  | 3.588073  | 7.469126  | 4.683891 | C    | -0.745373 | 2.541119  | 4.796193 |
| C  | 7.108873  | 8.605941  | 4.476814 | C    | -0.753439 | 4.984944  | 4.900692 |
| C  | 5.622677  | 8.606076  | 4.476780 | C    | -0.746370 | 7.415424  | 4.755478 |
| C  | 9.142722  | 7.469077  | 4.685778 | C    | -0.734470 | 9.885375  | 4.650010 |
| C  | 11.338973 | 8.653284  | 4.676955 | C    | 3.513871  | 12.344182 | 4.558244 |
| C  | 9.914913  | 8.665732  | 4.627825 | C    | 7.793376  | 12.312325 | 4.490159 |
| C  | 12.036130 | 7.415424  | 4.755478 | C    | 12.048478 | 12.355055 | 4.675153 |
| C  | 0.683225  | 9.885228  | 4.649653 |      |           |           |          |
| C  | 2.807178  | 11.120061 | 4.565418 | NCNC |           |           |          |
| C  | 1.391337  | 11.120086 | 4.625513 | C    | 0.697345  | 0.003525  | 7.486710 |
| C  | 3.523765  | 9.886371  | 4.540768 | C    | 2.812419  | 1.236306  | 7.486980 |
| C  | 4.944949  | 9.865584  | 4.486742 | C    | 1.399987  | 1.241944  | 7.486845 |
| C  | 7.076686  | 11.090185 | 4.461021 | C    | 3.516701  | 0.003487  | 7.486830 |
| C  | 5.655157  | 11.090308 | 4.460715 | C    | 4.938482  | 0.003673  | 7.486905 |
| C  | 7.786639  | 9.865154  | 4.486776 | C    | 7.056609  | 1.235017  | 7.486875 |
| C  | 9.207772  | 9.886248  | 4.541465 | C    | 5.642142  | 1.235277  | 7.486860 |
| C  | 11.340085 | 11.120418 | 4.630205 | C    | 7.760522  | 0.003525  | 7.486830 |
| C  | 9.924334  | 11.120024 | 4.569345 | C    | 9.182227  | 0.003574  | 7.486770 |
| C  | 12.048031 | 9.885375  | 4.650010 | C    | 11.298764 | 1.242192  | 7.486935 |
| N  | 5.015252  | 4.827086  | 8.217902 | C    | 9.886027  | 1.236764  | 7.486890 |
| N  | 7.750924  | 4.827172  | 8.217035 | C    | 12.001138 | 0.003587  | 7.486800 |
| N  | 5.018218  | 7.430811  | 7.968308 | C    | 0.696481  | 2.487019  | 7.487010 |
| N  | 7.748815  | 7.430541  | 7.966268 | C    | 2.827887  | 3.712748  | 7.486605 |
| N  | 6.366273  | 5.591715  | 5.616324 | C    | 1.403842  | 3.726256  | 7.486890 |
| N  | 4.928088  | 7.468904  | 4.548418 | C    | 3.522311  | 2.474887  | 7.486860 |
| N  | 7.803090  | 7.468732  | 4.548724 | C    | 4.936346  | 2.471231  | 7.487040 |
| Fe | 6.382021  | 6.084084  | 7.629753 | C    | 7.089135  | 3.731040  | 7.487010 |
| C  | -0.716318 | 12.280332 | 8.377838 | C    | 5.608779  | 3.731275  | 7.487190 |
| C  | 1.407328  | 13.517516 | 8.405344 | C    | 7.762126  | 2.471516  | 7.486935 |
| C  | 3.537518  | -0.019717 | 8.363881 | C    | 9.176109  | 2.475060  | 7.486875 |
| C  | 2.828166  | 13.510542 | 8.402913 | C    | 11.294377 | 3.726554  | 7.487040 |
| C  | 7.810082  | -0.021058 | 8.366210 | C    | 9.870281  | 3.713157  | 7.486800 |

|   |           |           |          |   |           |           |          |
|---|-----------|-----------|----------|---|-----------|-----------|----------|
| C | 12.001979 | 2.486932  | 7.487055 | C | 4.936642  | 9.928579  | 7.486965 |
| C | 0.705564  | 4.969187  | 7.486965 | C | 7.056778  | 11.164656 | 7.486845 |
| C | 2.892136  | 6.199936  | 7.486815 | C | 5.642451  | 11.164470 | 7.486905 |
| C | 1.460840  | 6.200097  | 7.486860 | C | 7.762345  | 9.928492  | 7.486770 |
| C | 3.600424  | 4.921067  | 7.486680 | C | 9.176139  | 9.924774  | 7.486860 |
| C | 9.096828  | 4.921315  | 7.486860 | C | 11.298857 | 11.157593 | 7.486770 |
| C | 11.236503 | 6.200184  | 7.486650 | C | 9.886107  | 11.163194 | 7.486770 |
| C | 9.804788  | 6.200146  | 7.486935 | C | 12.002032 | 9.912815  | 7.486755 |
| C | 11.992427 | 4.969199  | 7.486725 | N | 4.947679  | 4.886294  | 7.486980 |
| C | 0.705780  | 7.430920  | 7.486470 | N | 7.749635  | 4.886331  | 7.487025 |
| C | 2.828169  | 8.686937  | 7.486890 | N | 4.947937  | 7.513417  | 7.486815 |
| C | 1.404047  | 8.673540  | 7.486740 | N | 7.749690  | 7.513689  | 7.486815 |
| C | 3.600668  | 7.478495  | 7.486815 | C | -0.718662 | 0.003587  | 7.486800 |
| C | 7.089340  | 8.668894  | 7.486770 | C | 1.399948  | -1.234957 | 7.486935 |
| C | 5.609048  | 8.668559  | 7.486785 | C | 5.642192  | -1.228030 | 7.486905 |
| C | 9.096767  | 7.478767  | 7.486875 | C | 9.885848  | -1.229306 | 7.486770 |
| C | 11.294417 | 8.673503  | 7.486860 | C | -0.717821 | 2.486932  | 7.487055 |
| C | 9.870359  | 8.686751  | 7.486845 | C | -0.727373 | 4.969199  | 7.486725 |
| C | 11.992657 | 7.430895  | 7.486485 | C | -0.727143 | 7.430895  | 7.486485 |
| C | 0.696585  | 9.912617  | 7.486860 | C | -0.717768 | 9.912815  | 7.486755 |
| C | 2.812703  | 11.163194 | 7.486860 | C | 3.516960  | 12.395987 | 7.486830 |
| C | 1.400207  | 11.157543 | 7.486935 | C | 7.760781  | 12.396025 | 7.486830 |
| C | 3.522798  | 9.924638  | 7.486800 | C | 12.001398 | 12.396086 | 7.486800 |

## Supplementary References

- 1 G. Kresse and J. Furthmuller, *Phys. Rev. B: Condens. Matter Mater. Phys.*, 1996, **54**, 11169-11186.
- 2 J. P. Perdew, K. Burke and M. Ernzerhof, *Phys. Rev. Lett.*, 1996, **77**, 3865-3868.
- 3 P. E. Blöchl, *Phys. Rev. B*, 1994, **50**, 17953-17979.
- 4 J. Moellmann and S. Grimme, *J. Phys. Chem. C*, 2014, **118**, 7615-7621.
- 5 K. Momma and F. Izumi, *J. Appl. Cryst.*, 2011, **44**, 1272-1276.
